# Supplementary material for: Treatment Status and Healthcare Cost Trends for Patients with Multiple Sclerosis in Japan: A Claims Database Analysis
Source: Springer Nature journal article supplement (doi:10.1007/s40120-022-00374-4), 2022-06-17
Supplement: MOESM1 [file 23177230]

Supplementary Material

## **Treatment Status and Healthcare Cost Trends for Patients with Multiple Sclerosis in Japan: A Claims Database Analysis**

### **Author details:**

Izumi Kawachi<sup>1,2</sup>, Hiromichi Otaka<sup>3\*</sup>, Kosuke Iwasaki<sup>4</sup>, Tomomi Takeshima<sup>4</sup>, Kengo Ueda<sup>3</sup>

<sup>1</sup>Department of Neurology, Brain Research Institute, Niigata University, 1-757 Asahimachidori, Chuo-ku, Niigata, Japan

<sup>2</sup>Comprehensive Medical Education Center, Niigata University School of Medicine, 1-757 Asahimachidori, Chuo-ku, Niigata, Japan

<sup>3</sup>Neuroscience Medical Franchise, Medical Division, Novartis Pharma K.K., 1-23-1 Toranomom, Minato-ku, Tokyo, Japan

<sup>4</sup>Milliman Inc., 1-6-2 Kojimachi, Chiyoda-ku, Tokyo, Japan

### **Correspondence details:**

Hiromichi Otaka

Neuroscience Medical Franchise, Medical Division, Novartis Pharma K.K., 1-23-1 Toranomom, Minato-ku, Tokyo, Japan

Email: [hiromichi.otaka@novartis.com](mailto:hiromichi.otaka@novartis.com)

**Table S1.** Classification and definition of treatments

| Classification    | Treatment name                      | Definition*                                                                                          |
|-------------------|-------------------------------------|------------------------------------------------------------------------------------------------------|
| DMT               | Interferon - $\beta$ 1a             | Interferon Beta-1a (Genetical Recombination)                                                         |
|                   | Dimethyl fumarate                   | Dimethyl Fumarate                                                                                    |
|                   | Interferon- $\beta$ 1b              | Interferon Beta-1b (Genetical Recombination)                                                         |
|                   | Glatiramer acetate                  | Glatiramer Acetate                                                                                   |
|                   | Fingolimod hydrochloride            | Fingolimod Hydrochloride                                                                             |
|                   | Natalizumab                         | Natalizumab (Genetical Recombination)                                                                |
| Oral steroid      | Prednisolone                        | Excluding prednisolone prescribed within 3 months of prescription of other relapse treatment drug(s) |
| Immunosuppressant | Azathioprine                        | Azathioprine                                                                                         |
|                   | Tacrolimus Hydrate                  | Tacrolimus Hydrate                                                                                   |
|                   | Ciclosporin                         | Ciclosporin                                                                                          |
|                   | Mycophenolate Mofetil               | Mycophenolate Mofetil                                                                                |
|                   | Cyclophosphamide Hydrate            | Cyclophosphamide Hydrate                                                                             |
|                   | Methotrexate                        | Methotrexate                                                                                         |
|                   | Mitoxantrone Hydrochloride          | Mitoxantrone Hydrochloride                                                                           |
| Relapse treatment | Prednisolone                        | Prednisolone prescribed within 3 months of prescription with other relapse treatment drug(s)         |
|                   | Prednisolone Sodium Succinate       | Prednisolone Sodium Succinate                                                                        |
|                   | Dexamethasone Sodium Phosphate      | Dexamethasone Sodium Phosphate                                                                       |
|                   | Methylprednisolone Sodium Succinate | Methylprednisolone Sodium Succinate                                                                  |
|                   | plasma purification therapy         | J039, J041                                                                                           |

\*General name for drugs or procedure price table code for procedures.

DMT: disease-modifying therapy

**Table S2.** Definition of comorbidities

| Disease Name                                      | Definition (ICD-10 code) |
|---------------------------------------------------|--------------------------|
| Constipation                                      | K59.0                    |
| Polyneuropathy, unspecified                       | G62.9                    |
| Depressive episode, unspecified                   | F32.9                    |
| Epilepsy, unspecified                             | G40.9                    |
| Neuromuscular dysfunction of bladder, unspecified | N31.9                    |
| Headache                                          | R51                      |
| Dizziness and giddiness                           | R42                      |
| Rheumatoid arthritis, unspecified                 | M06.9                    |
| Other epilepsy                                    | G40.8                    |
| Generalized anxiety disorder                      | F41.1                    |
| Migraine, unspecified                             | G43.9                    |
| Neurotic disorder, unspecified                    | F48.9                    |
| Sicca syndrome                                    | M35.0                    |
| Trigeminal neuralgia                              | G50.0                    |

ICD-10: International Statistical Classification of Diseases and Related Health Problems, 10th revision

**Table S3.** Definition of clinical tests

| Name of clinical test                             | Definition (procedure price table code) |
|---------------------------------------------------|-----------------------------------------|
| MRI                                               | E202                                    |
| clinical psychological or neuropsychological test | D283-D285                               |
| neurological test                                 | D239-3                                  |
| ophthalmologic test                               | D255-D282-3                             |
| cerebrospinal fluid test                          | D403                                    |
| visual evoked potential test                      | D2362                                   |
| somatosensory evoked potential test               | D2361                                   |

MRI: magnetic resonance imaging.

**Figure S1. Treatment pattern by age (2017)**

The percentage for no treatment refers to the percentage of patients without any treatment listed below per patient month, and for each treatment per patient per month.

\*Oral steroid is prednisolone excluding those prescribed within 3 months of prescription with other relapse treatment drug(s) than prednisolone.

The colors are assigned for all drugs as below.

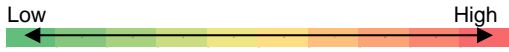

| Age                                             |                                           | ~9    | 10~19 | 20~29 | 30~39 | 40~49 | 50~59 | 60~69 | 70~79 | 80~89 | 90~   |
|-------------------------------------------------|-------------------------------------------|-------|-------|-------|-------|-------|-------|-------|-------|-------|-------|
| Number of patients (patient month): denominator |                                           | 175   | 846   | 3502  | 8568  | 13955 | 10890 | 8069  | 5098  | 1606  | 136   |
| No treatment                                    | No treatment patients                     | 64.6% | 71.3% | 65.2% | 65.2% | 64.6% | 70.1% | 74.4% | 83.4% | 88.7% | 97.1% |
| DMT                                             | Dimethyl fumarate                         | 0.000 | 0.052 | 0.117 | 0.075 | 0.068 | 0.059 | 0.020 | 0.009 | 0.002 | 0.000 |
|                                                 | IFN-β1a                                   | 0.320 | 0.025 | 0.059 | 0.062 | 0.062 | 0.058 | 0.025 | 0.004 | 0.000 | 0.000 |
|                                                 | IFN-β1b                                   | 0.000 | 0.024 | 0.043 | 0.046 | 0.054 | 0.049 | 0.035 | 0.012 | 0.001 | 0.000 |
|                                                 | Glatiramer acetate                        | 0.000 | 0.040 | 0.021 | 0.029 | 0.018 | 0.016 | 0.004 | 0.000 | 0.000 | 0.000 |
|                                                 | Fingolimod                                | 0.000 | 0.040 | 0.130 | 0.126 | 0.148 | 0.093 | 0.050 | 0.012 | 0.002 | 0.000 |
|                                                 | Natalizumab                               | 0.000 | 0.025 | 0.014 | 0.013 | 0.009 | 0.009 | 0.003 | 0.000 | 0.000 | 0.000 |
|                                                 | DMT total                                 | 0.320 | 0.206 | 0.383 | 0.352 | 0.360 | 0.284 | 0.136 | 0.037 | 0.005 | 0.000 |
| Oral steroid*                                   | Prednisolone                              | 0.246 | 0.143 | 0.062 | 0.119 | 0.118 | 0.157 | 0.222 | 0.184 | 0.119 | 0.000 |
|                                                 | Oral steroid total                        | 0.246 | 0.143 | 0.062 | 0.119 | 0.118 | 0.157 | 0.222 | 0.184 | 0.119 | 0.000 |
| Immunosuppressant                               | Azathioprine                              | 0.183 | 0.000 | 0.014 | 0.007 | 0.018 | 0.023 | 0.025 | 0.009 | 0.000 | 0.000 |
|                                                 | Tacrolimus                                | 0.000 | 0.053 | 0.013 | 0.013 | 0.008 | 0.016 | 0.036 | 0.018 | 0.019 | 0.000 |
|                                                 | Cyclosporine                              | 0.000 | 0.000 | 0.000 | 0.004 | 0.004 | 0.006 | 0.009 | 0.001 | 0.006 | 0.000 |
|                                                 | Mycophenolate mofetil                     | 0.000 | 0.011 | 0.003 | 0.006 | 0.000 | 0.005 | 0.002 | 0.000 | 0.000 | 0.000 |
|                                                 | Cyclophosphamide                          | 0.000 | 0.012 | 0.009 | 0.000 | 0.001 | 0.001 | 0.001 | 0.001 | 0.001 | 0.000 |
|                                                 | Methotrexate                              | 0.000 | 0.000 | 0.000 | 0.001 | 0.002 | 0.018 | 0.018 | 0.006 | 0.011 | 0.000 |
|                                                 | Mitoxantrone                              | 0.000 | 0.000 | 0.000 | 0.000 | 0.000 | 0.000 | 0.000 | 0.000 | 0.000 | 0.000 |
|                                                 | Immunosuppressant total                   | 0.183 | 0.076 | 0.041 | 0.031 | 0.033 | 0.068 | 0.091 | 0.035 | 0.037 | 0.000 |
| Relapse treatment drugs                         | Prednisolone (relapse therapy)            | 0.149 | 0.183 | 0.095 | 0.084 | 0.061 | 0.052 | 0.059 | 0.063 | 0.017 | 0.044 |
|                                                 | prednisolone sodium succinate             | 0.006 | 0.018 | 0.007 | 0.006 | 0.006 | 0.003 | 0.007 | 0.006 | 0.000 | 0.000 |
|                                                 | Dexamethasone phosphate ester sodium      | 0.000 | 0.009 | 0.000 | 0.004 | 0.001 | 0.005 | 0.023 | 0.028 | 0.006 | 0.000 |
|                                                 | Methylprednisolone sodium ester succinate | 0.171 | 0.136 | 0.160 | 0.107 | 0.094 | 0.057 | 0.033 | 0.025 | 0.016 | 0.081 |
|                                                 | Relapse treatment drugs total             | 0.326 | 0.346 | 0.262 | 0.201 | 0.162 | 0.118 | 0.122 | 0.122 | 0.039 | 0.125 |
| Relapse treatment                               | Plasma purification therapy               | 0.000 | 0.000 | 0.012 | 0.003 | 0.002 | 0.004 | 0.004 | 0.001 | 0.001 | 0.000 |

DMT: disease-modifying therapy, IFN: interferon

**Figure S2.** Prevalence of comorbidities by age (2017)

The colors are assigned as below.

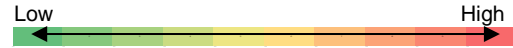

| Age                                               | 0     | 10~19 | 20~29 | 30~39 | 40~49 | 50~59 | 60~69 | 70~79 | 80~89 | 90~   |
|---------------------------------------------------|-------|-------|-------|-------|-------|-------|-------|-------|-------|-------|
| Number of patients (patient month): denominator   | 175   | 846   | 3502  | 8568  | 13955 | 10890 | 8069  | 5098  | 1606  | 136   |
| Constipation                                      | 9.1%  | 8.0%  | 7.0%  | 13.3% | 18.0% | 21.4% | 28.1% | 28.9% | 29.0% | 11.0% |
| Polyneuropathy, unspecified                       | 1.7%  | 3.7%  | 7.3%  | 9.9%  | 13.8% | 15.1% | 17.7% | 14.9% | 13.9% | 14.7% |
| Depressive episode, unspecified                   | 0.0%  | 0.8%  | 5.3%  | 6.2%  | 9.3%  | 10.4% | 11.7% | 7.8%  | 7.2%  | 0.0%  |
| Epilepsy, unspecified                             | 2.9%  | 6.7%  | 6.7%  | 5.7%  | 7.0%  | 9.6%  | 9.2%  | 8.3%  | 5.2%  | 1.5%  |
| Neuromuscular dysfunction of bladder, unspecified | 0.0%  | 1.4%  | 1.4%  | 3.8%  | 5.1%  | 8.0%  | 9.0%  | 8.9%  | 10.5% | 8.8%  |
| Headache                                          | 12.0% | 5.8%  | 9.9%  | 8.5%  | 7.8%  | 6.6%  | 4.7%  | 3.3%  | 1.9%  | 0.0%  |
| Dizziness and giddiness                           | 0.0%  | 3.1%  | 3.7%  | 4.1%  | 5.1%  | 4.9%  | 5.0%  | 6.0%  | 2.4%  | 0.0%  |
| Rheumatoid arthritis, unspecified                 | 0.0%  | 0.6%  | 0.9%  | 1.8%  | 3.1%  | 4.4%  | 6.4%  | 6.3%  | 5.9%  | 1.5%  |
| Other epilepsy                                    | 5.1%  | 4.4%  | 2.5%  | 2.7%  | 2.9%  | 3.8%  | 3.6%  | 3.5%  | 2.1%  | 0.0%  |
| Generalized anxiety disorder                      | 0.0%  | 3.1%  | 1.9%  | 2.8%  | 3.1%  | 3.4%  | 4.7%  | 3.5%  | 2.1%  | 0.0%  |
| Migraine, unspecified                             | 0.0%  | 3.4%  | 4.7%  | 3.6%  | 3.4%  | 3.6%  | 1.8%  | 1.2%  | 0.2%  | 0.0%  |
| Neurotic disorder, unspecified                    | 0.0%  | 0.0%  | 0.6%  | 2.5%  | 2.7%  | 2.4%  | 3.3%  | 2.0%  | 2.7%  | 0.0%  |
| Sicca syndrome                                    | 0.0%  | 1.4%  | 0.9%  | 1.3%  | 2.6%  | 2.3%  | 3.9%  | 2.7%  | 2.7%  | 0.0%  |
| Trigeminal neuralgia                              | 0.0%  | 0.0%  | 0.8%  | 1.1%  | 1.8%  | 2.7%  | 4.0%  | 2.3%  | 0.9%  | 0.0%  |

**Figure S3.** Healthcare resource utilization and healthcare costs by age (2017)

The colors are assigned by each item group (clinical tests, hospitalization, relapse, hospital visit, or healthcare costs) as below.

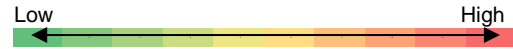

| Age                                             |                                                   | ~9     | 10~19   | 20~29   | 30~39   | 40~49   | 50~59   | 60~69  | 70~79  | 80~89  | 90~    |
|-------------------------------------------------|---------------------------------------------------|--------|---------|---------|---------|---------|---------|--------|--------|--------|--------|
| Number of patients (patient month): denominator |                                                   | 175    | 846     | 3502    | 8568    | 13955   | 10890   | 8069   | 5098   | 1606   | 136    |
| Clinical tests (PPPM)                           | MRI                                               | 0.291  | 0.294   | 0.240   | 0.205   | 0.185   | 0.147   | 0.110  | 0.084  | 0.057  | 0.059  |
|                                                 | Clinical psychological or neuropsychological test | 0.011  | 0.002   | 0.002   | 0.002   | 0.002   | 0.002   | 0.002  | 0.002  | 0.008  | 0.000  |
|                                                 | Neurological test                                 | 0.000  | 0.004   | 0.008   | 0.006   | 0.004   | 0.004   | 0.002  | 0.001  | 0.000  | 0.000  |
|                                                 | Ophthalmologic test                               | 0.549  | 0.755   | 0.371   | 0.313   | 0.346   | 0.320   | 0.378  | 0.377  | 0.270  | 0.015  |
|                                                 | Cerebrospinal fluid test                          | 0.023  | 0.026   | 0.021   | 0.012   | 0.009   | 0.006   | 0.007  | 0.010  | 0.009  | 0.007  |
|                                                 | Visual evoked potential test                      | 0.000  | 0.006   | 0.007   | 0.004   | 0.002   | 0.002   | 0.001  | 0.001  | 0.000  | 0.000  |
|                                                 | Somatosensory evoked potential test               | 0.000  | 0.012   | 0.006   | 0.005   | 0.003   | 0.003   | 0.001  | 0.002  | 0.000  | 0.000  |
| Hospitalization (PPPM)                          | Hospitalization                                   | 0.057  | 0.059   | 0.033   | 0.028   | 0.024   | 0.025   | 0.032  | 0.040  | 0.045  | 0.066  |
| Relapse (PPPM)                                  | Relapse                                           | 0.023  | 0.039   | 0.039   | 0.029   | 0.027   | 0.021   | 0.016  | 0.015  | 0.009  | 0.015  |
| Hospital visit (PPPM)                           | Hospital visit                                    | 0.771  | 0.758   | 0.792   | 0.786   | 0.884   | 0.834   | 0.921  | 0.962  | 0.822  | 0.640  |
| Healthcare costs (JPY, PPPM)                    | Total healthcare costs                            | 96,475 | 138,026 | 114,216 | 122,478 | 116,799 | 102,481 | 88,618 | 72,789 | 78,541 | 68,576 |
|                                                 | MS treatment cost                                 | 40,866 | 41,526  | 81,337  | 84,107  | 82,010  | 55,568  | 28,783 | 10,449 | 3,802  | 64     |
|                                                 | Clinical test cost                                | 3,627  | 4,112   | 3,086   | 2,626   | 2,438   | 2,010   | 1,667  | 1,411  | 995    | 848    |
|                                                 | Other healthcare costs                            | 51,982 | 92,388  | 29,793  | 35,744  | 32,351  | 44,903  | 58,169 | 60,929 | 73,743 | 67,664 |

JPY: Japanese yen, MRI: magnetic resonance imaging, MS: multiple sclerosis, PPPM: per patient per month.
